# Supplementary material
Source: PubMed Central journal article supplement (PMC2572125)
Supplement: embor2008147-s1.pdf [file embor2008147-s1.pdf]

## ***Pr-Set7 and Suv4-20h regulate H4 lysine-20 methylation at imprinting control regions in the mouse***

### **(A) SUPPLEMENTARY FIGURES**

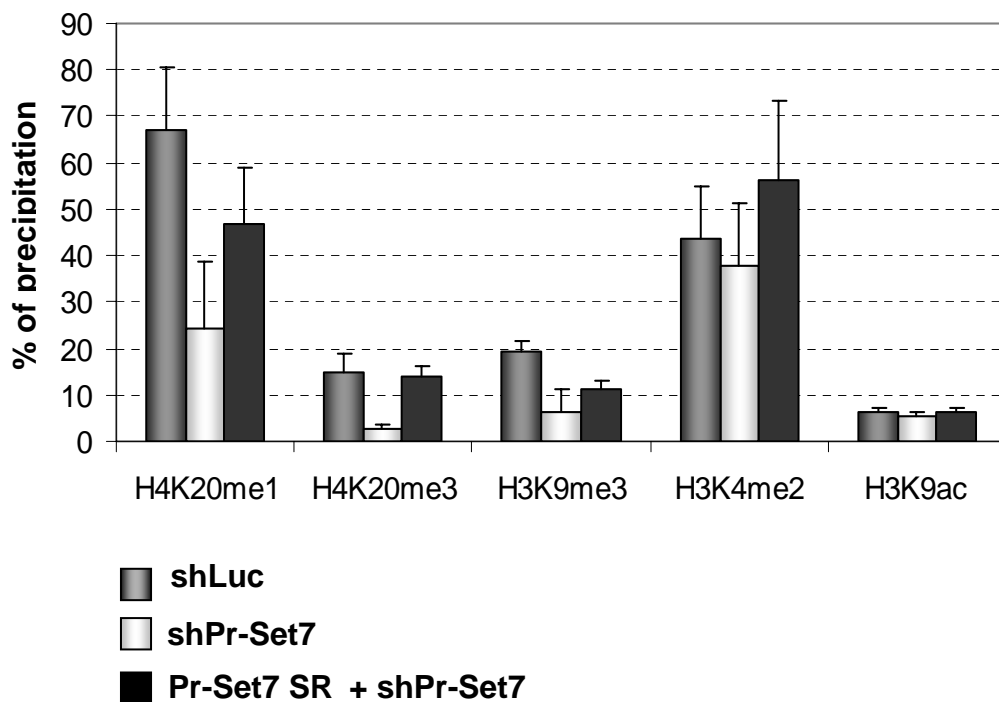

#### **Supplementary Fig 1**

Rescue of Pr-Set7 expression restores normal histone methylation levels in shPr-Set7 cells. ChIP was performed on chromatin extracted from WT (dark grey bars) and shPr-Set7 (light grey bars) MEFs. Pr-set7 protein levels were brought back to normal in shPrSet7 cells, by co-expressing a Pr-Set7-SR transgene (black) which is not regulated by the hairpin RNA (due to single nucleotide changes). Error bars represent standard deviation between at least three different ChIP experiments on independent chromatin preparations. Precipitation levels (% of input) at the *H19* ICR were determined by dividing the average value of the IPs by the average value of the corresponding input chromatin. For technical reasons, these experiments had to be performed on immortalised cells, as opposed to the ones shown in Fig 3C which were performed on primary cells.

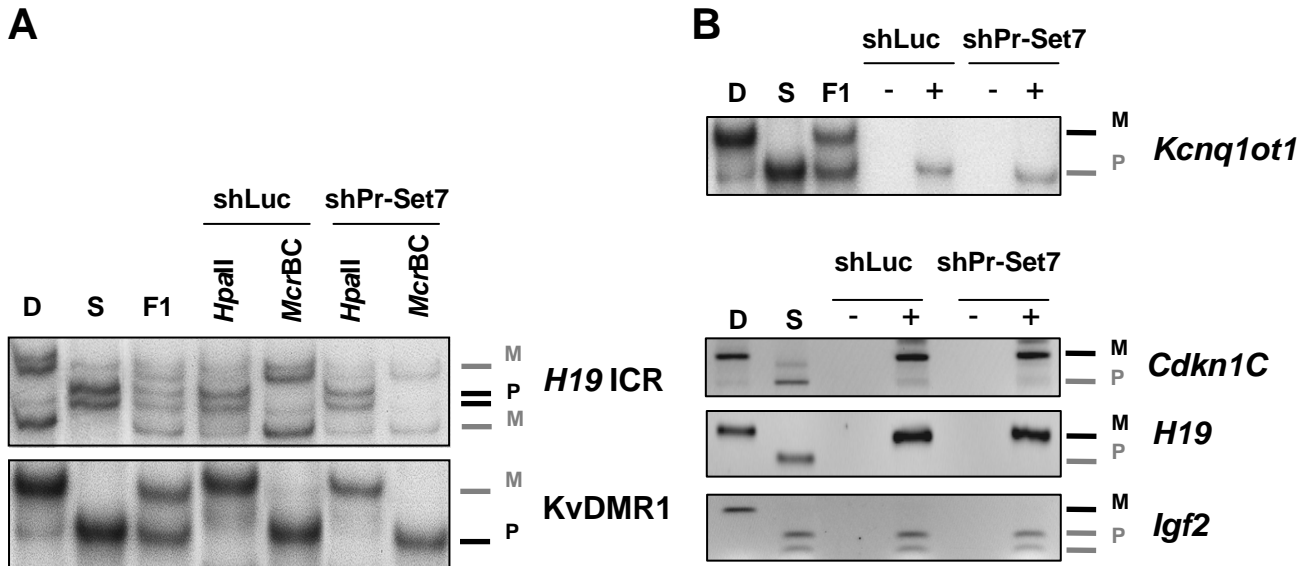

### Supplementary Fig 2

Unaltered DNA methylation and gene expression in Pr-Set7 knock-down MEFs at the *Kcnq1* and *Igf2-H19* imprinted domains. **(A)** Allelic analysis of DNA methylation by PCR-SSCP at the *H19* ICR and KvDMR1, in Pr-Set7 knock-down cells (shPr-Set7) and control cells (shLuc). DNA digestion was with *Hpa*II (cuts unmethylated DNA) or *Mcr*BC (cuts methylated DNA). D, C57BL/6 control DNA; S, SDP711 congenic control with distal 7 of *M. spretus*; F1, (C57BL/6 x SDP711) F1 control; M, maternal allele; P, paternal allele. **(B)** Analysis of allelic expression of *Kcnq1ot1*, *Cdkn1C*, *H19* and *Igf2* in shPr-Set7 cells. Allelic *Kcnq1ot1* expression was studied by discrimination of SSCP polymorphisms by gel-electrophoresis; *Cdkn1c*, *H19* and *Igf2* were analysed using polymorphic *Ava*I (*Cdkn1c*), *Bgl*II (for *H19*) and *Bsa*AI (for *Igf2*) restriction sites (Supplementary Table 2).

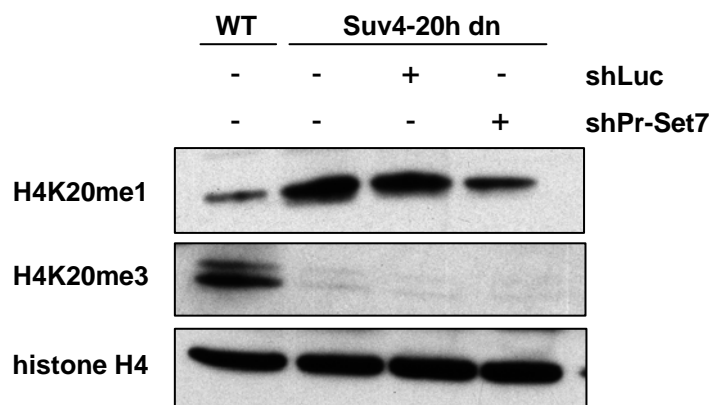

### Supplementary Fig 3

Immunoblot analysis of the levels of histone H4, H4K20me1 and H4K20me3 in wild-type (WT) and Suv4-20h dn MEFs, and in Suv4-20h dn MEFs 4 days after shLuc or shPr-Set7 infection. Note the increase in H4K20me1 and the absence of H4K20me3 in Suv4-20h dn MEFs compared to wild-type MEFs. Pr-Set7 depletion in Suv4-20h dn MEFs leads to a significant reduction in H4K20me1.

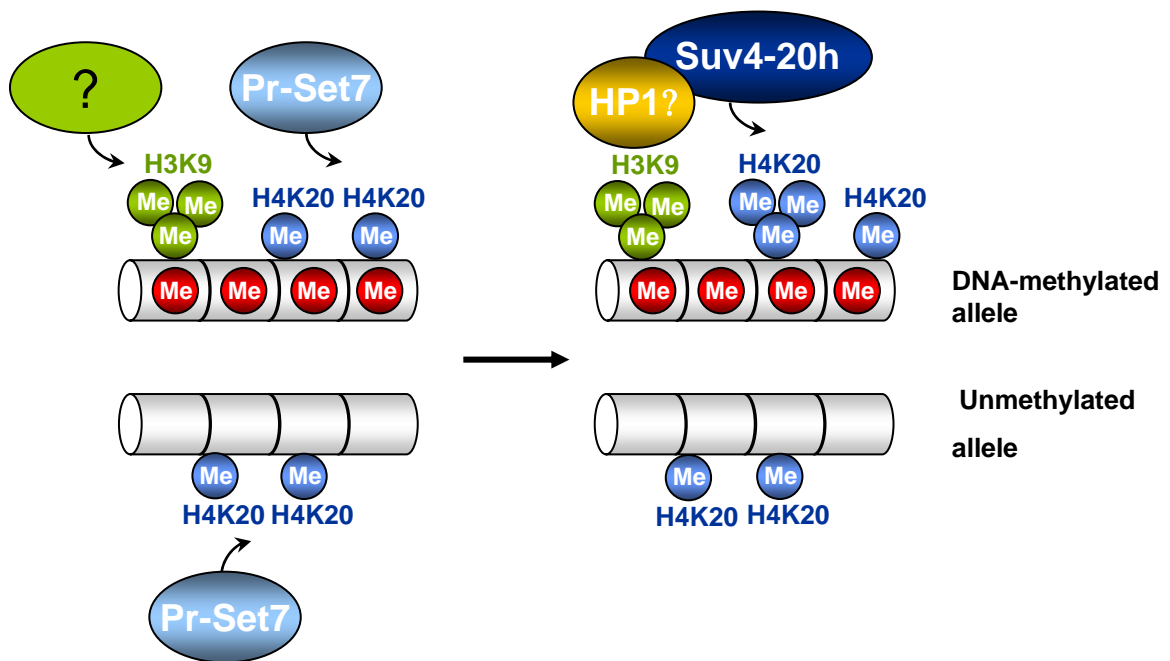

#### Supplementary Fig 4

Model for allelic H4K20me3 and H3K9me3 regulation at ICR. In somatic cells, Pr-Set7 mediates H4K20me1 at ICRs. On the DNA-methylated allele ('Me'), H4K20me1 is converted into H4K20me3 by Suv4-20h, which is recruited to this parental allele. Recruitment of Suv4-20h seems downstream to the maintenance of DNA methylation, since this is unaltered in Suv4-20h-deficient and Pr-Set7-depleted cells. Suv4-20h recruitment could be linked to the presence of H3K9me3, which is controlled by a HMT(s) other than Suv39h and could be recognized by HP1g proteins. The levels of H4K20me3 and H3K9me3 at the methylated alleles of ICRs appear to be linked in somatic cells, via a yet-unknown mechanism.

## **(B) SUPPLEMENTARY MATERIALS AND METHODS**

**ChIP on native and cross-linked chromatin** ChIP on non-fixed chromatin was performed as previously described (Umlauf *et al.*, 2004) using 5 $\mu$ g of antibody per 3 $\mu$ g of chromatin. We used antisera against H4K20me3 (Upstate, 07-463), H3K9me3 (Upstate, 07-442), H3K4me2 (Upstate, 07-030), H3K9ac (Upstate, 06-942), H4K20me1 (Abcam, ab9051), and H3K27me3 (Abcam ab6002). As a control, mock precipitation, we used a rabbit-antiserum against chicken IgG (Sigma, C2288). In each study, experiments were performed with at least three independently prepared chromatin samples. Input chromatin and immunoprecipitations (IP) were quantified by real-time PCR amplification (in triplicate) with a SYBR Green mix using an MX3000 apparatus (Stratagene).

The percentage of precipitation was calculated by dividing the average value of the IP (priorly corrected for the average value of the corresponding mock precipitations) by the average value of the corresponding input chromatin. When possible, parental alleles were distinguished by electrophoretic detection of SSCPs in PCR products (see Supplementary Table 1).

ChIP on cross-linked chromatin was performed as described before (Umlauf *et al.*, 2004). Semi-confluent cells were cross-linked with 0.5% (for Suv4-20h, H3K27me3 and H3K9ac) or 1% (for HP1g) formaldehyde, for 10 min at room temp, and for subsequent ChIP we used antisera directed against Suv4-20h1/h2 (Abcam, ab18186), Hp1g (Upstate, 05-690), H3K27me3 (Abcam ab6002) and H3K9ac (Upstate, 06-942). Quantitative PCR was carried out as for ChIP on unfixed chromatin.

**Western blot analysis** Western blotting (Tardat *et al.*, 2007) was performed using antisera directed against Pr-Set7 (1:1000; Upstate 07-316), b-actin (1:20000; Sigma), H4K20me1 (1:1000; Abcam, ab9051), H4K20me3 (1:1000; Upstate, 07-463) and histone H4 (1:2000; Upstate, 07-108).

## (C) Supplementary Tables

### Supplementary Table I

| Oligonucleotides used for SSCP and methyl-sensitive PCR |         |                        |                                               |                            |
|---------------------------------------------------------|---------|------------------------|-----------------------------------------------|----------------------------|
| ICR                                                     | Primer  | Primer sequences       | Location                                      | Reference                  |
| H19                                                     | Forward | TCACTTAAGGAACCGCCAAC   | 3 kb upstream of <i>H19</i> start site        | Delaval <i>et al.</i> 2007 |
|                                                         | Reverse | ACATTGTCATGGGCAAACCT   |                                               |                            |
| KvDMR1                                                  | Forward | CTCAGTTCCACGATACCCTTCC | 6 kb downstream of <i>Kcnq1ot1</i> start site | Umlauf <i>et al.</i> 2004  |
|                                                         | Reverse | CTTACAGAAGCAGGGGTGGTCT |                                               |                            |

| Oligonucleotides used for qPCR |         |                          |                                               |                            |
|--------------------------------|---------|--------------------------|-----------------------------------------------|----------------------------|
| ICR                            | Primer  | Primer sequences         | Location                                      | Reference                  |
| <i>H19</i>                     | Forward | TCACTTAAGGAACCGCCAAC     | 3 kb upstream of <i>H19</i> start site        | Delaval <i>et al.</i> 2007 |
|                                | Reverse | CAATTGATTTTGGGCTGACA     |                                               |                            |
| KvDMR1                         | Forward | GATCGTCCTCTGCATGGTTT     | 6 kb downstream of <i>Kcnq1ot1</i> start site | Umlauf <i>et al.</i> 2004  |
|                                | Reverse | CATGGAGGTCTAGGCTCAGG     |                                               |                            |
| <i>Gtl2</i>                    | Forward | CTTTTGTGACCACAACCCTTG    | 11 kb upstream of <i>Gtl2</i> start site      | Delaval <i>et al.</i> 2007 |
|                                | Reverse | AATCCCACCACAGCTTCTTAGC   |                                               |                            |
| <i>Snrpn</i>                   | Forward | AGGTTGTGACTGGGATCTTG     | 200 bp downstream of <i>Snrpn</i> start site  | This study                 |
|                                | Reverse | TGCAGCGGCAACAGAACTTCT    |                                               |                            |
| <i>Igf2r</i>                   | Forward | TCGTGTAGAAATCCTCCGATCT   | 7 kb downstream of <i>Igf2r</i> start site    | Delaval <i>et al.</i> 2007 |
|                                | Reverse | TTTACGGGCGATTTAGAGCAC    |                                               |                            |
| Major satellite                | Forward | GACGACTTGAAAAATGACGAAATC |                                               | Peters <i>et al.</i> 2003  |
|                                | Reverse | CATATTCCAGGTCCTTCAGTGTGC |                                               |                            |

## Supplementary Table II

| Oligonucleotides used for PCR after bisulfite treatment |         |                         |            |
|---------------------------------------------------------|---------|-------------------------|------------|
| ICR                                                     | Pimer   | Primer sequences        | Reference  |
| KvDMR1                                                  | Forward | GGTGAGGTTATATTAGTTAGTTA | This study |
|                                                         | Reverse | CTAAACAAAAAACTCTCCAAAT  |            |

| Oligonucleotides used for RT-PCR |         |                         |              |                            |
|----------------------------------|---------|-------------------------|--------------|----------------------------|
| Gene                             | Pimer   | Primer sequences        | Polym.       | Reference                  |
| <i>Kcnq1ot1</i>                  | Forward | CTCAGTTCCACGATACCCTTCC  | SSCP         | Umlauf <i>et al.</i> 2004  |
|                                  | Reverse | CTTACAGAAGCAGGGGTGGTCT  |              |                            |
| <i>H19</i>                       | Forward | CATCCTGGAGCCAAGCCTCTAC  | RFLP<br>BglI | This study                 |
|                                  | Reverse | CCTCAGACGGAGATGGACGACAG |              |                            |
| <i>Igf2</i>                      | Forward | ATCGTCCCCTGATCGTGTTAC   | RFLP<br>BsaI | Weber <i>et al.</i> 2003   |
|                                  | Reverse | GGAAGTGTCCCTGCTCAAGA    |              |                            |
| <i>Cdkn1C</i>                    | Forward | TTCAGATCTGACCTCAGACCC   | RFLP<br>AvaI | Caspary <i>et al.</i> 1998 |
|                                  | Reverse | AGTTCTCTTGCGCTTGGC      |              |                            |

| Oligonucleotides used for shRNA |                            |                           |
|---------------------------------|----------------------------|---------------------------|
| Target                          | Oligonucleotides sequences | Reference                 |
| <i>Luciferase</i>               | TGCGTTGCTAGTACCAAC         | Tardat <i>et al.</i> 2007 |
| <i>Pr-Set7</i>                  | GCTGCAGTCTGAAGAAAGG        | This study                |

### References cited in Supplementary Tables I and II:

- Caspary T *et al.* (1998) Multiple mechanisms regulate imprinting of the mouse distal chromosome 7 gene cluster. *Mol Cell Biol* **18**:3466-3474
- Delaval K *et al.* (2007) Differential histone modifications mark mouse imprinting control regions during spermatogenesis. *EMBO J* **26**:720-729
- Peters AH *et al.* (2003) Partitioning and plasticity of repressive histone methylation states in mammalian chromatin. *Mol Cell* **12**:1577-1589
- Tardat M *et al.* (2007) PR-Set7 dependent lysine methylation ensures genome replication and stability through S phase. *J Cell Biol* **179**:1413-1426
- Umlauf D *et al.* 2004) Imprinting along the *Kcnq1* domain on mouse chromosome 7 involves repressive histone methylation and recruitment of Polycomb group complexes. *Nat Genet* **36**: 1296-1300
- Weber M *et al.* (2003) Genomic imprinting controls matrix attachment regions in the *Igf2* gene. *Mol Cell Biol* **23**:953-959
